# Supplementary material for: Invasive Fusariosis in Nonneutropenic Patients, Spain, 2000–2015
Source: PubMed Central journal article supplement (PMC7774531; doi:10.3201/eid2701.190782), 2021-01
Supplement: 19-0782-Techapp-s1.pdf [file 19-0782-Techapp-s1.pdf]

# Invasive Fusariosis in Nonneutropenic Patients, Spain, 2000–2015

## Appendix

**Appendix Table 1.** Participating hospitals in study on invasive fusariosis, Spain, 2000–2015

| Hospital                                                                         |
|----------------------------------------------------------------------------------|
| Hospital Universitario La Paz, Madrid                                            |
| Hospital General Universitario Gregorio Marañón, Madrid                          |
| Hospital Universitari i Politècnic la Fe, Valencia                               |
| Hospital Universitario Cruces, Baracaldo, Vizcaya                                |
| Hospital Universitario Marqués de Valdecilla, Santander                          |
| Hospital Universitario Miguel Servet, Zaragoza                                   |
| Hospital Universitario Virgen del Rocío, Seville                                 |
| Hospital Universitario General de Alicante, Alicante                             |
| Hospital Universitario Reina Sofía de Córdoba, Córdoba                           |
| Fundación Instituto Valenciano de Oncología (FIVO), Valencia                     |
| Hospital Universitari de Bellvitge, Barcelona                                    |
| Hospital Universitario de Gran Canaria Doctor Negrín, Las Palmas de Gran Canaria |
| Hospital Universitario Ramón y Cajal, Madrid                                     |
| Hospital Universitario Virgen de Valme, Seville                                  |
| Hospital de la Santa Creu i Sant Pau, Barcelona                                  |
| Hospital Universitario 12 de Octubre, Madrid                                     |
| Hospital Universitari Vall d'Hebron, Barcelona                                   |
| Hospital Universitario Puerta del Mar, Cádiz                                     |

**Appendix Table 2.** Characteristics of patients with localized and disseminated invasive fusariosis, Spain, 2000–2015\*

| Variables                         | Neutropenic |              |          | Nonneutropenic |              |          |
|-----------------------------------|-------------|--------------|----------|----------------|--------------|----------|
|                                   | Localized   | Disseminated | p value† | Localized      | Disseminated | p value† |
| Total                             | 9 (100.0)   | 35 (100.0)   |          | 10 (100.0)     | 4 (100.0)    |          |
| Sex                               |             |              |          |                |              |          |
| M                                 | 6 (66.7)    | 20 (57.1)    | 0.72     | 6 (60.0)       | 2 (50.0)     | 1.00     |
| F                                 | 3 (33.3)    | 15 (42.9)    | 0.72     | 4 (40.0)       | 2 (50.0)     | 1.00     |
| Median age, y (IQR)               | 45 (28–65)  | 47 (29–65)   | 0.81‡    | 58 (26–79)     | 67 (56–79)   | 0.57‡    |
| Treatment history (previous 30 d) |             |              |          |                |              |          |
| Antifungal                        | 4 (44.4)    | 28 (80.0)    | 0.09     | 2 (20.0)       | 3 (75.0)     | 1.00     |
| Corticosteroid                    | 2 (22.2)    | 14 (40.0)    | 0.31     | 4 (40.0)       | 2 (50.0)     | 1.00     |
| Underlying conditions             |             |              |          |                |              |          |
| Hematologic malignancy            | 8 (88.9)    | 33 (94.3)    | 0.51     | 3 (30.0)       | 2 (50.0)     | 0.58     |
| Hematologic stem cell transplant  | 1 (11.1)    | 10 (28.6)    | 0.41     | 1 (10.0)       | 2 (50.0)     | 0.18     |
| Graft-versus-host disease         | 1 (11.1)    | 3 (8.6)      | 0.56     | 0              | 1 (25.0)     | 0.29     |
| Solid tumor                       | 0           | 1 (2.9)      | 1.00     | 1 (10.0)       | 0            | 1.00     |
| Other                             | 1 (11.1)    | 1 (2.9)      | 0.37     | 6 (60.0)       | 2 (50.0)     | 1.00     |
| Clinical manifestations           |             |              |          |                |              |          |
| Fever                             | 8 (88.9)    | 32 (91.4)    | 1.00     | 4 (40.0)       | 4 (100)      | 0.09     |
| Skin lesions                      | 2 (22.2)    | 27 (77.1)    | <0.01    | 1 (10.0)       | 2 (50.0)     | 0.18     |
| Lung involvement                  | 3 (33.3)    | 29 (82.9)    | <0.01    | 5 (50.0)       | 4 (100)      | 0.22     |
| Fungemia                          | 3 (33.3)    | 18 (51.4)    | 0.46     | 4 (40.0)       | 1 (25.0)     | 1.00     |
| Sinusitis                         | 0           | 8 (22.9)     | 0.04     | 0              | 1 (25.0)     | 0.29     |
| Blindness                         | 0           | 4 (11.4)     | 0.57     | 0              | 0            |          |
| Concurrent infection              | 6 (66.7)    | 19 (54.3)    | 0.71     | 3 (30.0)       | 3 (75.0)     | 0.25     |

\*Values are no. (%), except where indicated.

†p values obtained by Fisher exact test, except where indicated.

‡Determined by Mann-Whitney U test.

**Appendix Table 3.** Therapeutic regimens used to treat patients with invasive fusariosis, Spain, 2000–2015\*

| Treatment                                      | Total      | Neutropenic | Nonneutropenic | p value† |
|------------------------------------------------|------------|-------------|----------------|----------|
| Total                                          | 58 (100.0) | 44 (100.0)  | 14 (100.0)     |          |
| Monotherapy                                    | 36 (62.1)  | 24 (54.5)   | 12 (85.7)      | 0.04‡    |
| Azole                                          | 17 (29.3)  | 8 (18.2)    | 9 (64.3)       | 0.002    |
| Voriconazole                                   | 16 (27.6)  | 8 (18.2)    | 8 (57.1)       | 0.01‡    |
| Posaconazole                                   | 1 (1.7)    | 0           | 1 (7.1)        | 0.24     |
| Amphotericin B                                 | 19 (32.8)  | 16 (36.4)   | 3 (21.4)       | 0.35     |
| Liposomal amphotericin B                       | 17 (29.3)  | 14 (31.8)   | 3 (21.4)       | 0.52     |
| Amphotericin B lipid complex                   | 1 (1.7)    | 1 (2.3)     | 0              | 1.00     |
| Amphotericin B deoxicholate                    | 1 (1.7)    | 1 (2.3)     | 0              | 1.00     |
| Combined therapy                               | 16 (27.6)  | 16 (36.4)   | 0              | 0.006    |
| Liposomal amphotericin B plus voriconazole     | 13 (22.4)  | 13 (29.5)   | 0              | 0.03     |
| Liposomal amphotericin B plus posaconazole     | 2 (3.4)    | 2 (4.5)     | 0              | 1.00     |
| Amphotericin B lipid complex plus voriconazole | 1 (1.7)    | 1 (2.3)     | 0              | 1.00     |
| Other§                                         | 3 (5.2)    | 2 (4.5)     | 1 (7.1)        | 1.00     |
| Not treated                                    | 3 (5.2)    | 2 (4.5)     | 1 (7.1)        | 1.00     |

\*Values are no. (%), except where indicated.

†p values obtained by Fisher exact test, except where indicated.

‡Determined by  $\chi^2$  test.

§2 patients received empirical caspofungin and 1 received empirical micafungin.

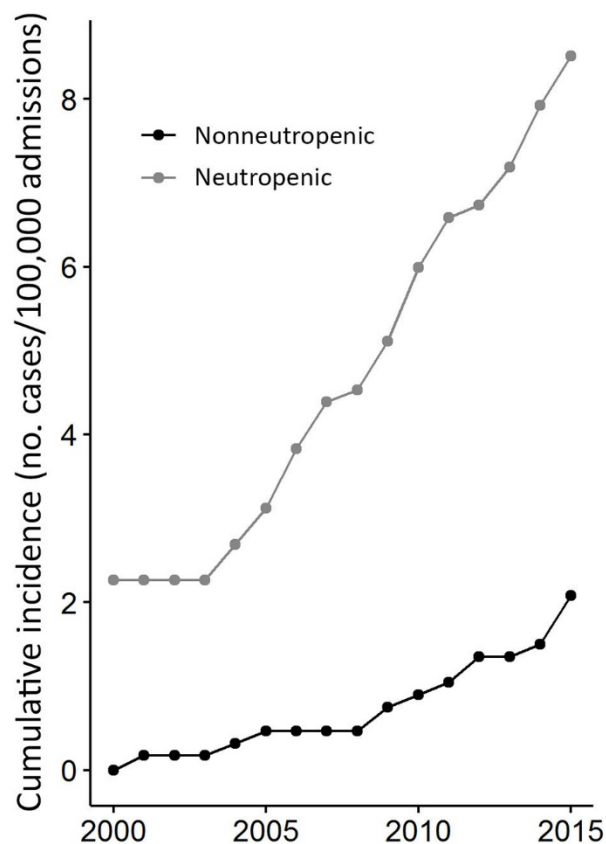

**Appendix Figure 1.** Yearly cumulative incidence of invasive infections caused by *Fusarium* spp., Spain, 2000–2015.

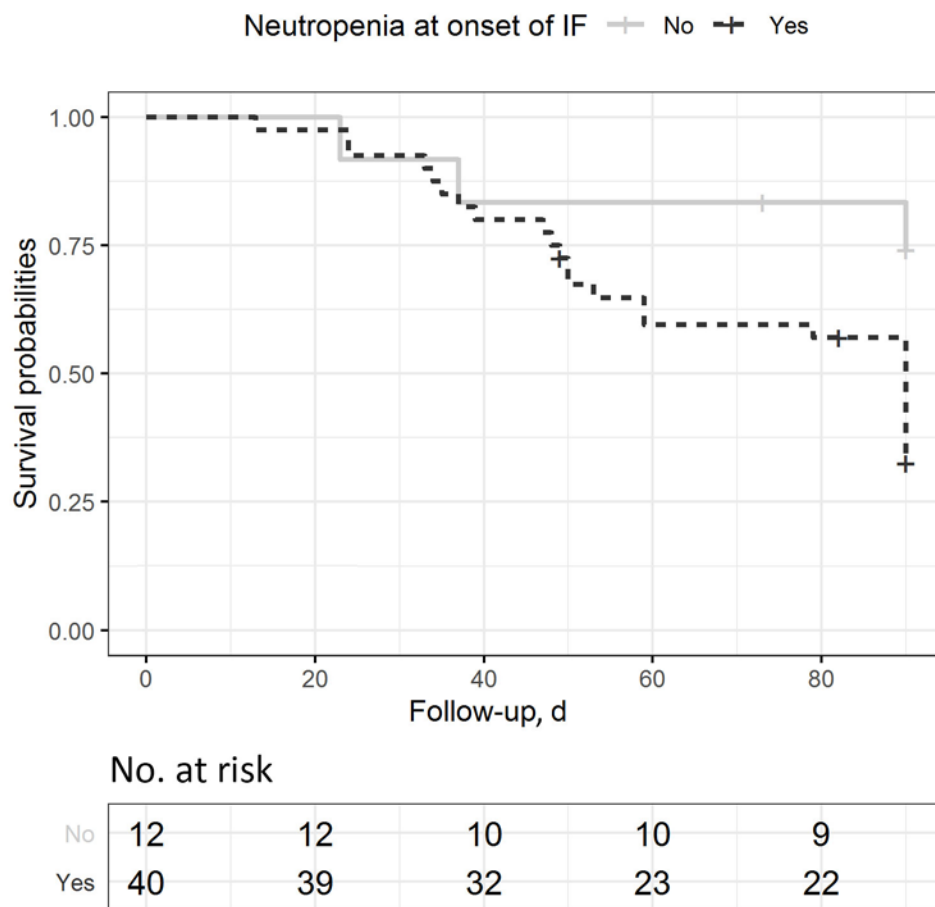

**Appendix Figure 2.** Probability of 90-day survival of patients with invasive fusariosis, Spain, 2000–2015. Log-rank test;  $p = 0.03$ .
